# Supplementary material for: Modifiability of Composite Cardiovascular Risk Associated With Chronic Kidney Disease in Type 2 Diabetes With Finerenone
Source: PubMed Central journal article supplement — JAMA Cardiol. 2023 Jun 14;8(8):732–41. doi: 10.1001/jamacardio.2023.1505 (PMC10267848; doi:10.1001/jamacardio.2023.1505), 2023-06-14
Supplement: jamacardiol-e231505-s002.pdf [file jamacardiol-e231505-s002.pdf]

## Data Sharing Statement

Agarwal. Modifiability of Composite Cardiovascular Risk Associated With Chronic Kidney Disease in Type 2 Diabetes With Finerenone. *JAMA Cardiol.* Published June 14, 2023. doi:10.1001/jamacardio.2023.1505

### Data

**Data available:** No
